# Supplementary material for: Light-triggered “on–off” switching of fluorescence based on a naphthopyran-containing compound polymer micelle
Source: Royal Society of Chemistry journal article supplement (doi:10.1039/c6py00490c), 2016-01-01
Supplement: c6py00490c1.pdf [file c6py00490c1.pdf]

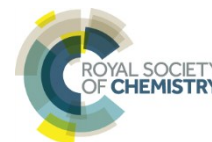

**Journal Name**

ARTICLE

**Electronic Supplementary Information**

**Light-triggered “on-off” switching of fluorescence based on a naphthopyran-containing compound polymer micelle**

Dehua Li,<sup>a,§</sup> Jinhui Jiang,<sup>b,§</sup> Qitong Huang,<sup>b,§</sup> Guang Wang<sup>\*a</sup> Meiduo Zhang,<sup>a</sup> and Jianzhong Du<sup>\*b,c</sup>

<sup>a</sup> Faculty of Chemistry, Northeast Normal University, Changchun 130024, P R China

<sup>b</sup> Department of Polymeric Materials, School of Materials Science and Engineering, Tongji University, 4800 Caoan Road, Shanghai 210804, PR China

<sup>c</sup> Shanghai Tenth People's Hospital, Tongji University School of Medicine, Shanghai 200072, China

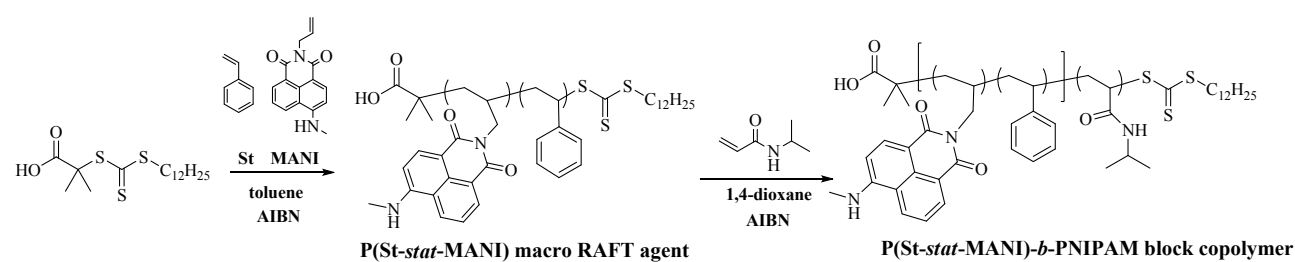

**Fig. S 1** Synthesis of P(St-*stat*-MANI)-*b*-PNIPAM diblock copolymer.

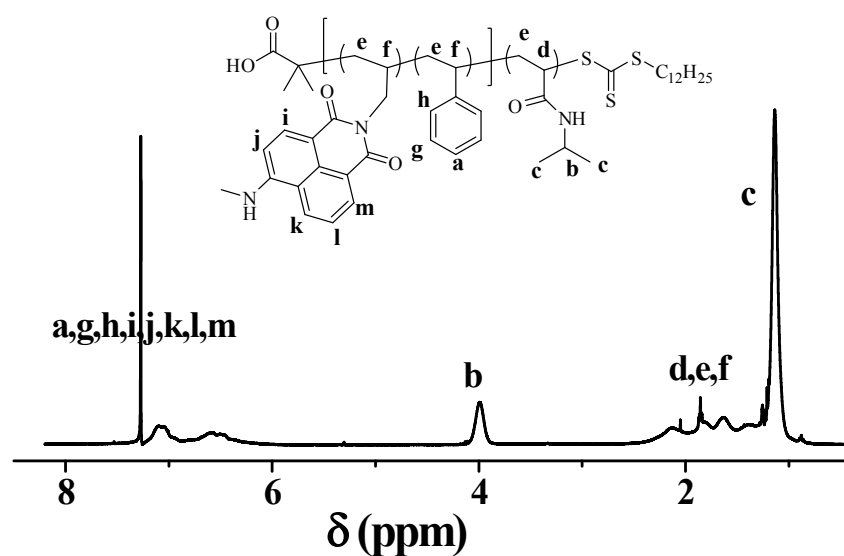

**Fig. S 2**  $^1\text{H}$  NMR spectrum of P(St-*stat*-MANI)-*b*-PNIPAM diblock copolymer.

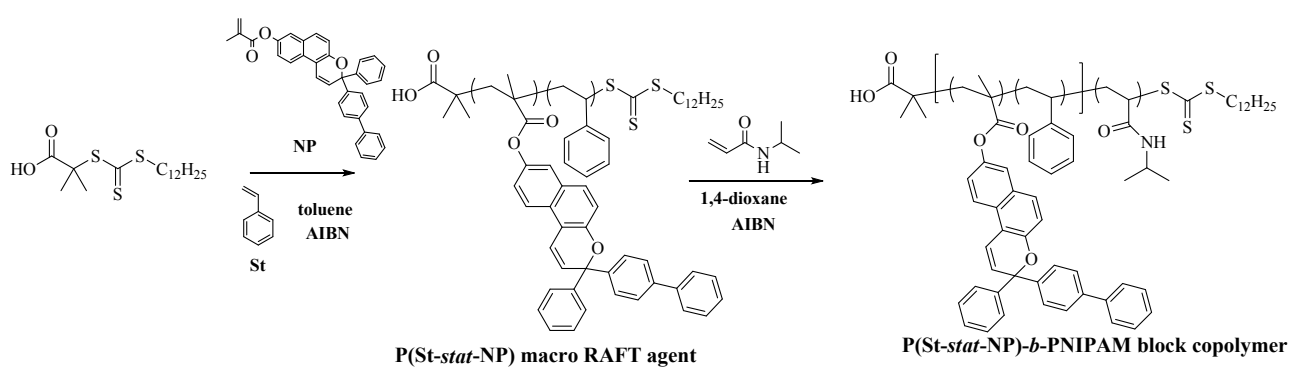

**Fig. S 3** Synthesis of P(St-*stat*-NP)-*b*-PNIPAM diblock copolymer.

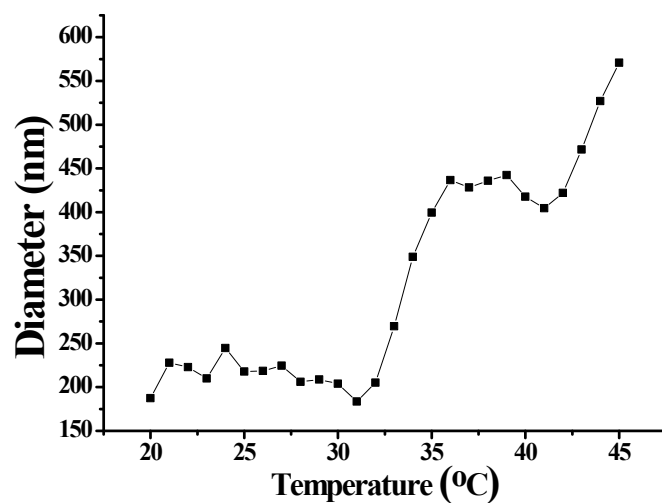

**Fig. S 4** The hydrodynamic diameters of compound micelles by increasing temperature from 20 °C to 45 °C.

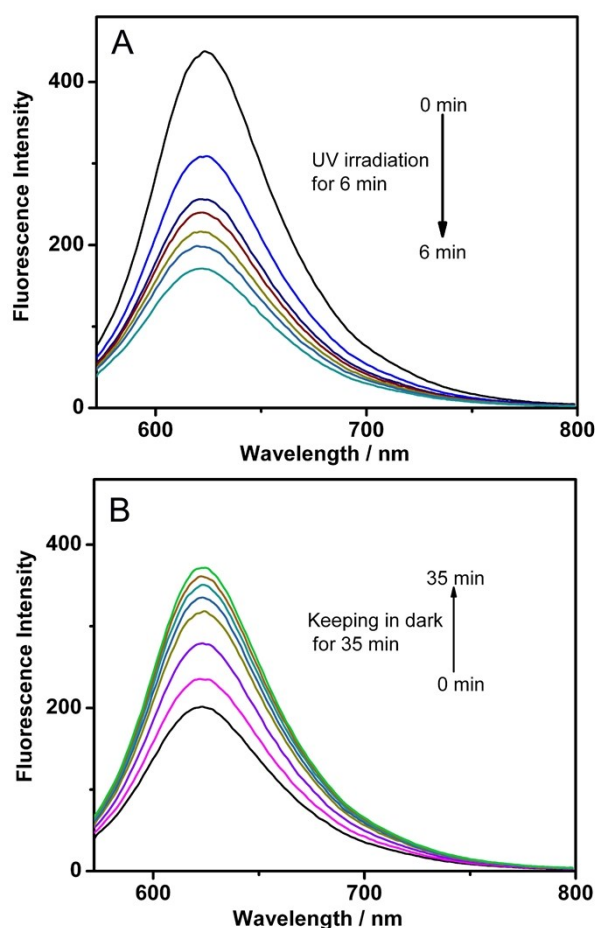

**Fig. S 5** Fluorescent emission spectra of polymer micelles solution with encapsulated Nile Red: (A) Nile Red was released under UV (365 nm) irradiation and (B) Nile Red was gradually re-encapsulated into the reorganized micelles after removing UV irradiation.
